1 Splicing stimulates antisense transcription by  
2 RNA polymerase II at DNA double-strand  
3 breaks in *Drosophila* cells  
4

5 Romy Böttcher, Ines Schmidts, Volker Nitschko, Petar  
6 Duric and Klaus Förstemann

7  
8 Ludwig-Maximilians-Universität München, Dept. of Biochemistry and Gene Center,  
9 Feodor-Lynen-Strasse 25, 81377 München, Germany

10  
11 \* correspondence: Foerstemann@genzentrum.lmu.de  
12

## 1 Abstract

2  
3 DNA double-strand breaks are among the most toxic lesions that can occur in a genome  
4 and their faithful repair is thus of great importance. Recent findings have uncovered a role  
5 for local transcription that initiates at the break and forms a non-coding transcript, called  
6 damage-induced long non-coding RNA or dilncRNA, which helps to coordinate the DNA  
7 transactions necessary for repair. We provide nascent RNA sequencing-based evidence that  
8 dilncRNA transcription by RNA polymerase II is more efficient if the DNA break occurs  
9 in an intron-containing gene in *Drosophila*. The spliceosome thus stimulates recruitment  
10 of RNA polymerase to the break, rather than the annealing of sense and antisense RNA. In  
11 contrast, RNA polymerase III nascent RNA libraries did not contain reads corresponding  
12 to the cleaved loci. Furthermore, selective inhibition of RNA polymerase III did not reduce  
13 the yield of damage-induced siRNAs (derived from the dilncRNA in *Drosophila*) and the  
14 damage-induced siRNA density was unchanged downstream of a T8 sequence, which  
15 terminates RNA polymerase III transcription. We thus found no evidence for a  
16 participation of RNA polymerase III in dilncRNA transcription and damage-induced  
17 siRNA generation in flies.  
18  
19  
20

# 1 Introduction

2  
3 The siRNA silencing system in *Drosophila* helps to fend off viral infections [1], but also  
4 contributes to the control of transposon mobilization in somatic cells [2]. In both cases, the  
5 trigger for siRNA generation is double-stranded RNA (dsRNA). During viral infection,  
6 this likely stems from replication intermediates, while for genome surveillance convergent  
7 transcription must occur. For multi-copy sequences, this convergent transcription can also  
8 be envisaged to occur *in trans*, i.e. at different instances of the same sequence. A particular  
9 form of dsRNA generation has been identified in *Drosophila* at transcribed DNA double-  
10 strand breaks [3]. The genetic requirements indicate an involvement of the spliceosome  
11 and this appears to be true for the surveillance of high-copy sequences as well [4].  
12 Intriguingly, stalled spliceosomes can recruit RNA-dependent RNA polymerase (RdRP) to  
13 transposon mRNAs in the pathogenic yeast *Cryptococcus neoformans* [5]. For organisms  
14 that lack an RdRP gene, however, induction of convergent transcription must happen at the  
15 DNA. Thus, while the role of small RNAs in *Drosophila* DNA repair appears to be limited  
16 at best [6], their induction at a transcribed double-strand break may reveal mechanistic  
17 aspects of transposon recognition in flies.

18 DNA double-strand breaks (DSB) are highly toxic genome lesions that need to be faithfully  
19 repaired. A finely orchestrated series of molecular interactions is initiated once a DSB has  
20 been detected and signaling events recruit repair factors, modify local chromatin structure  
21 and mitigate access between transcription and DNA repair proteins [7]. Many studies have  
22 concluded that a relatively large region around the DSB is transcriptionally silenced in a  
23 reversible manner, presumably to avoid conflicts between transcription and repair [8]. In  
24 recent years, however, antisense transcription that initiates at the DNA break has been  
25 observed [9-11]. In the context of DNA repair, this transcription seems to fine-tune the  
26 dose of single-strand binding proteins such as RPA that initially associate with the 3'->5'  
27 resected break [9]. Furthermore, damage-induced small RNAs derived from these antisense  
28 transcripts have been observed in *Neurospora*, *Arabidopsis* and human as well as  
29 *Drosophila* cell lines [3, 12-14]. This has provided sequencing-based evidence of DNA  
30 break-induced antisense transcription. Recently, break-induced transcription was also  
31 directly observed in human cells using single-molecule microscopy experiments [11].

32 While there is thus little doubt that a non-coding transcript initiates at the break (often  
33 referred to as damage-induced long non-coding RNA or dilncRNA), we still do not have a  
34 comprehensive understanding of its biogenesis, in particular regarding whether differences  
35 exist between transcribed (i.e. within transcriptionally active genes) and non-transcribed  
36 breaks. *In vivo*, DNA breaks occur in a chromatin-context and the mechanisms of  
37 dilncRNA generation may differ depending on the local chromatin state, which determines  
38 the accessibility for RNA polymerases. Furthermore, low-level transcription by RNA  
39 polymerase II may be much more pervasive due to e.g. inefficient termination, promoter-  
40 and enhancer-associated, unstable transcripts etc. [15-18] and reviewed in [19-21]. Plants  
41 have even devoted the function of two polymerase II related, multi-subunit polymerases,  
42 RNA polymerase IV and IVb/V, to pervasive genome surveillance [22-25]. Their non-  
43 coding transcripts can activate a number of cellular responses to cope with transposon  
44 invasion, viral infection and also DNA breaks [14].

45 RNA polymerase I transcribes the rDNA and is largely confined to the nucleolus [26],  
46 whereas RNA polymerase III generates a series of non-coding transcripts. This polymerase

1 also functions in certain cases to detect aberrant DNA: It transcribes AT-rich linear DNA  
2 that may be cytoplasmic [27, 28] or nuclear in the case of Herpesviruses [29-31]. The  
3 resulting pol-III transcripts then activate the cellular interferon response via RIG-I, an RNA  
4 helicase recognizing 5'-triphosphate-containing RNA in a double-stranded configuration  
5 [32]. Furthermore, RNA polymerase III can transcribe transposon-derived *Alu* elements  
6 and may even determine new integration sites for Ty1 in budding yeast [33]. The  
7 transcriptional landscape of both, RNA pol II and pol III is thus complex and dynamic.  
8 At least at a non-transcribed DNA end, RNA polymerase II can initiate at the DNA break  
9 to generate a dilncRNA. This model is supported, for example, by studies using RNA  
10 polymerase II specific inhibitors [34], chromatin-immunoprecipitation [35] and by the  
11 detection of dilncRNAs associated with RNA polymerase phosphorylated at tyrosine-1  
12 within the CTD repeats in a metagene-analysis [36]. Recruitment of RNA polymerase II to  
13 the DNA end can involve the Mre11-Rad50-Nbs1 complex (MRN-complex) [37].  
14 Transcription initiation at DNA breaks has been reconstituted *in vitro* with linear DNA,  
15 purified RNA polymerase II and the MRN-complex [37]. It appears that initial unwinding  
16 of the DNA end by the MRN complex promotes transcription initiation by RNA  
17 polymerase II. This view has been challenged, however, by observations that claim  
18 recruitment of RNA polymerase III – also with the help of the MRN complex - to double-  
19 strand breaks in cultured human cells [38]. There are thus opposing views about which  
20 RNA polymerase generates the transcript that initiates at the DNA end, and there may be  
21 more than one answer to this question.  
22 In *Drosophila*, the dilncRNA originating from a DNA break is converted into damage-  
23 induced siRNAs if the break occurs in actively transcribed genes. The convergent  
24 transcripts form dsRNA, which is processed by the canonical RNAi machinery into Ago2-  
25 loaded siRNAs capable of silencing cognate transcripts [3, 6]. While their physiological  
26 role – if any – remains unclear [6, 39], the siRNAs are much more stable than the original  
27 dilncRNA and thus can serve as a convenient proxy of dilncRNA transcription [3, 40].  
28 Since they are loaded into Ago2, 2'-*O*-methyl modified and capable of cleaving cognate  
29 mRNAs [3, 6], they can even serve as a reporter system for dilncRNA generation [4]. In  
30 *Drosophila*, the damage-induced siRNA response starts very close to the break and covers  
31 the gene – including introns – up to the transcription start site (TSS). This argues that the  
32 dilncRNA initiates in direct vicinity of the break and is processively transcribed at least up  
33 to the TSS. Yet, neighboring genes were not affected [4]. In contrast, transfection of a  
34 promoterless, linear PCR product of ~ 2 kb into cultured *Drosophila* cells did not produce  
35 any corresponding siRNAs [3]; a mere resection at either end is thus not sufficient to  
36 generate enough dilncRNA in each orientation for dsRNA formation. Results from a  
37 genome-wide screen in *Drosophila* cells suggest that spliceosomes assembled on the  
38 normal transcript can stimulate the generation of corresponding damage-induced siRNAs.  
39 This was corroborated by the observation that DNA breaks upstream of a gene's first intron  
40 or anywhere within intron-less genes produce few siRNAs upon damage [4].  
41 In this manuscript we address the question whether the spliceosome acts upstream or  
42 downstream of the dilncRNA induction. In a downstream involvement, the spliceosome  
43 would serve as an RNA chaperone and promote the annealing of the coding (sense) and  
44 non-coding (antisense) transcripts, thus boosting siRNA generation. An upstream action  
45 implies that the spliceosome can stimulate the generation of dilncRNAs, i.e. the initiation  
46 of transcription at the break, and thereby increase the amount of dsRNA generated and

1 ultimately the siRNA yield. The two mechanisms can be distinguished by examining  
2 nascent transcription at DNA breaks in intron-containing and intronless genes. If the  
3 spliceosome acts as an RNA chaperone, the amount of dilncRNA should be comparable  
4 between intron-containing and intronless genes while a regulatory role should lead to more  
5 dilncRNA for the intron-containing gene than for its intronless counterpart. We thus  
6 measured the antisense RNA generation via nascent transcript sequencing after inducing a  
7 single DSB in an intron-containing or an intron-less gene. We observed that a DSB  
8 downstream of introns leads to higher levels of antisense transcription, arguing that the  
9 spliceosome stimulates dilncRNA production. Furthermore, it appears that in *Drosophila*  
10 cells it is RNA polymerase II that transcribes the dilncRNA.

11

12

13

## 1 Results

2  
3  
4 The aim of our study was to measure the rate of antisense transcription at a transcribed  
5 DNA break for an intron-containing and an intronless gene. Furthermore, we wanted to  
6 determine which RNA polymerase is recruited for this purpose in *Drosophila*.  
7 Incorporation of labeled nucleotide analogs such as 4SU (4SU-Seq) or biotinylated dNTPs  
8 (PRO-Seq) allows to measure nascent transcriptomes with high sensitivity but cannot  
9 distinguish between RNA polymerases. While specific inhibitor treatments are available,  
10 they have the caveat that inhibition of RNA polymerase II will also abrogate transcription  
11 of the normal mRNA transcripts, which recruits the spliceosome and may thus participate  
12 in induction of antisense transcription at intron-containing genes. Yet, this is precisely what  
13 we wanted to test.

14 We therefore established a nascent RNA sequencing strategy based on polymerase-specific  
15 immunoprecipitation (nascent elongating transcript sequencing or NET-seq [41, 42]). In  
16 short, we lysed cultured *Drosophila* S2-cells harboring epitope-tags on RNA polymerase  
17 II or III (introduced via genome editing) and washed out cytoplasmic and soluble nuclear  
18 components. Then, a brief digestion with benzonase liberated chromatin-associated  
19 material (“input” in our figures), from which we could subsequently immunopurify tagged  
20 polymerases (“IP” in our figures). The short RNA stump protected by the polymerase  
21 during the benzonase treatment can directly enter our established small RNA sequencing  
22 library pipeline because benzonase products carry a 5'-monophosphate (see supplementary  
23 Figure S1 for an outline of our cell fractionation and NET-seq procedure). To verify our  
24 protocol, we sequenced both the input material for the IP (roughly speaking chromatin-  
25 associated RNA) and the polymerase-associated transcripts after immunoprecipitation.

### 26 *Validation of the NET-Seq procedure*

27 We first examined the highly transcribed, protein-coding actin gene *act5C*. The profile of  
28 matching reads from the input material is dominated by the exonic portions of the gene,  
29 consistent with the notion that splicing can occur co-transcriptionally before release from  
30 the chromatin. Nonetheless, a certain level of intronic reads is already visible and  
31 demonstrates that the material also contains nascent transcripts. The nascent, RNA  
32 polymerase II associated reads sequenced after specific immunoprecipitation (IP) show a  
33 much stronger proportion of these intronic reads (Fig. 1 A, top panel). In comparison, the  
34 RNA polymerase III IP only showed non-specific background (distribution essentially  
35 unchanged - Fig. 1A, middle panel). Many genes show RNA polymerase II pausing shortly  
36 after transcript initiation. In *Drosophila*, this phenomenon was first comprehensively  
37 described in ChIP-Seq and PRO-seq experiments [43, 44]. Accordingly, promoter-  
38 proximal pausing is evident in the PRO-Seq trace for *act5C* as well as in our nuclear RNA  
39 sample (input) and particularly in the RNA-polymerase-II associated, nascent transcripts.  
40 When comparing our NET-Seq results for this highly abundant mRNA with published  
41 results of a nascent RNA labeling approach (PRO-seq), it appears that our libraries still  
42 contain a moderate overrepresentation of exonic reads [45], presumably reflecting a higher  
43 background level in our NET-seq approach.

44 For a global perspective, we also mapped reads onto precompiled transcript classes  
45 (Flybase genome release 6.19) and determined the recovery (ratio of IP versus input after

1 normalization to total genome matching reads in each library) for RNA polymerase II and  
2 III. The CDS collection corresponds to the protein coding part of the transcriptome (start  
3 to stop) and the recovery was clearly greater in the pol-II IP than in the pol-III IP (Fig. S2  
4 A, pol-II IP n=6, pol-III IP n=4). The intronic part of the transcriptome also showed a  
5 preferential recovery with pol-II, but a certain number of introns also trended towards a  
6 high recovery in both, the pol-II and the pol-III IP (Fig. S2 B). Manual inspection of an  
7 arbitrary subset usually indicated the presence of non-coding RNAs such as snRNAs or  
8 snoRNAs in these introns.

9 To verify successful IP for RNA polymerase III, we analyzed the read distribution along  
10 the non-coding 7SK RNA locus (Fig. 1B). While RNA polymerase II associated nascent  
11 transcripts did not show a particular enrichment of signal along the locus (top panel), the  
12 corresponding reads were enriched after IP of RNA polymerase III (middle panel). Note  
13 that the 7SK RNA can be associated with RNA polymerase II while the CTD is  
14 phosphorylated by pTEF-b; this associated 7SK RNA could thus have co-purified and  
15 augmented the 7SK-mapping read number. However, this does not appear to contribute  
16 substantially to the RNA polymerase II IP signal. As expected, the PRO-Seq procedure  
17 also captured transcription of the RNA polymerase III transcribed 7SK locus (bottom  
18 panel). When we mapped the reads onto the Flybase collection of tRNA sequences, we  
19 found a preferential recovery for at least a subset of the tRNAs in the RNA polymerase III  
20 IP (Fig. S2 C). This is also visible when we mapped the reads onto the Flybase collection  
21 of “all transcripts”, which despite its name only comprises the protein-coding and  
22 lncRNAs. Essentially all of these are transcribed by RNA polymerase II but the *Ntl* locus  
23 is a notable exception (Fig. S2 D). This transcript appears pol-III transcribed according to  
24 our analysis, overlaps with an intron-containing Tyr-GTA tRNA gene and direct  
25 visualization of the mapping traces revealed that the read-counts mapped to the *Ntl* locus  
26 almost exclusively localize to the tRNA portion (Fig. S2 E).

27 Our Net-Seq libraries are contaminated by abundant cytoplasmic non-coding RNAs. This  
28 is illustrated with the help of the *bantam* locus (Fig. 1C). The 23 nt small RNA is one of  
29 the most abundant miRNAs in S2-cells and it is nucleolytically processed from a much  
30 larger primary transcript by Drosha and Dicer-1. The mature miRNA is cytoplasmic, yet  
31 our nuclear RNA fraction still contained a substantial amount of bantam reads (top and  
32 middle panel, input). While the IP procedure decreased this contamination, it did not  
33 remove the bantam reads completely (top and middle panel, IP). However, in the case of  
34 RNA polymerase II the nascent RNA reads indicate that larger precursor ncRNAs are  
35 transcribed (top panel, IP). This is consistent with the PRO-Seq reads from the locus  
36 (bottom panel). The three example loci for Fig. 1 were chosen because the published PRO-  
37 Seq reads can be represented at roughly comparable ppm-scales, hence their transcriptional  
38 output should be, as a first approximation, of comparable magnitude. Our own Net-Seq  
39 data for *act5C* and *7SK* can indeed also be displayed with comparable scales, but the  
40 *bantam* locus required different scaling due to the cytoplasmic contamination. We also  
41 observed a substantial amount of mature ribosomal RNA reads in our libraries both, before  
42 and after IP (23%-72% of total genome-matching reads, with no obvious enrichment of  
43 unprocessed precursor transcripts). For these RNAs, no interpretation of our sequencing  
44 data should be attempted. This also limits conclusions about highly abundant RNAs  
45 transcribed by RNA polymerase III such as 5S rRNA. For most other transcripts, we  
46 conclude that our nascent RNA sequencing data successfully captures polymerase-specific

1 profiles. Since our question focuses on the induced antisense transcription at DNA breaks,  
2 an RNA species that is neither cytoplasmic nor highly abundant, we conclude that the NET-  
3 Seq libraries are suitable for our analysis.

#### 4 *A DSB downstream of introns shows higher dilncRNA transcription activity*

5 We generated sequencing libraries after employing our established *cas9*/CRISPR system  
6 to cleave in the intron-containing gene *CG15098* and, separately, in the intronless gene *tctp*  
7 [4]. As before, the DNA breaks had been induced by transfection of a corresponding  
8 sgRNA expression cassette into cells that stably express the Cas9 protein. The majority of  
9 the cells were harvested and processed for NETseq libraries 2 or 3 days after transfection.  
10 The remaining cells were processed for a T7 endonuclease assay, demonstrating that the  
11 targeted loci were indeed cleaved with comparable efficiency (see also supplementary Fig.  
12 1). In our experiments, libraries from the *tctp*-cut provide the “uncut” control for the  
13 *CG15098* locus and *vice-versa*. This comparison ensures that any effects not specific to the  
14 cut locus or due to Cas9 activation *per se* will be accounted for.

15 We mapped the NET-seq libraries onto the respective loci and calculated the number of  
16 sense and antisense-matching reads. Figure 2 shows traces for one NET-Seq replicate  
17 mapped to *CG15098* (left side) and *tctp* (right side). For *CG15098*, IP of RNA polymerase  
18 II associated, nascent transcripts led to an enrichment of antisense reads relative to input  
19 (Fig. 2A). In contrast, the antisense reads did not increase for the cut *tctp* locus, consistent  
20 with the low amounts of siRNAs generated upon cleavage of this locus [4]. There was no  
21 indication for a prominent signal in the RNA polymerase III NET-seq libraries of either  
22 locus (Fig. 2B).

23 To obtain a quantitative view of the replicate data, we normalized the number of antisense  
24 reads to the total transcriptional activity of the locus in each library [i.e. antisense / (sense  
25 + antisense)] (Fig. 2C). There was a significant increase of antisense reads for cut vs. uncut  
26 *CG15098* ( $p=0.012$ , t-test unpaired, unequal variance,  $n=3$ ) while no significant differences  
27 were observed for the neighboring *CG15099* ( $p=0.640$ ,  $n=3$ ) or *act5C*, which resides on a  
28 different chromosome ( $p=0.644$ ,  $n=3$ ). We also normalized the antisense reads to the total  
29 number of genome-matching reads in each library (Supplementary Figure 3). In each of  
30 the three replicate experiments, the amount of *CG15098* antisense-matching nascent, RNA  
31 polymerase II associated reads was higher in the cut state than in the uncut state ( $p=0.034$ ,  
32 paired t-test,  $n=3$ ). This was not the case for *CG15099* gene ( $p=0.273$ ,  $n=3$ ) or the *act5C*  
33 gene ( $p=0.675$ ,  $n=3$ ); there were too few *tctp* antisense matching reads for an analogous  
34 comparison. Finally, our input material also showed a consistently higher amount of  
35 antisense-matching reads for *CG15098* in the cut state in each replicate ( $p=0.072$ , paired t-  
36 test,  $n=3$ ). In agreement with the visual inspection (Fig. 2B), the read quantification did not  
37 provide any indication that RNA polymerase III is contributing to antisense transcription  
38 (Supplementary Figure 3, bottom row).

39 We conclude that induction of a DNA double-strand break in the intron-containing  
40 *CG15098* gene stimulates antisense transcription by RNA polymerase II. For the intronless  
41 *tctp*-gene, we detected none or only few antisense reads and statistical analysis is not  
42 appropriate. Our observations are thus consistent with the notion that a lower antisense  
43 transcription activity for the intronless gene (this study) correlates with fewer DNA-  
44 damage induced siRNAs [4]. It therefore appears that the role of the spliceosome is to  
45



1 stimulate dilncRNA transcription, rather than to promote annealing of the sense and  
2 antisense RNA strands.

### 3 4 *No evidence for participation of RNA polymerase III in the biogenesis of damage-induced* 5 *siRNAs*

6 The recent description of MRN-dependent RNA polymerase III recruitment to DNA breaks  
7 in human cell lines [38] clearly differs from our observation of a predominant – if not  
8 exclusive - role of RNA polymerase II in dilncRNA generation (Fig. 2). It is certainly  
9 conceivable that mechanistic differences exist between humans and flies (as is the case for  
10 the subsequent processing into siRNAs, see [39]), but we wanted to confirm our  
11 observation with an independent approach. We thus turned to our established dual  
12 luciferase reporter system, which relies on the silencing activity of damage-induced  
13 siRNAs generated from a co-transfected, linearized plasmid (Fig. 3A, right side). With this  
14 assay, we had previously screened and detected a role for the MRN-complex in promoting  
15 siRNA generation, presumably by preparing the DNA end for RNA polymerases that  
16 initiate transcription at the break [4]. The inhibitor Mirin can block the access of Mre11 to  
17 dsDNA ends and thus all nucleolytic activities, while its derivative PFM-01 selectively  
18 blocks DNA access to the endonuclease active site [46]. Addition of Mirin (25  $\mu$ M final  
19 concentration) clearly reduced the amount of damage-induced siRNAs generated ( $p=0.05$ ,  
20 t-test, unequal variance,  $n=3$ ), while PFM-01 (25  $\mu$ M) had essentially no effect (Fig. 3A).  
21 This supports the notion that the initial unwinding of the double-stranded DNA by Mre-11  
22 is important for dilncRNA generation, rather than endonucleolytic cleavage and resection  
23 that exposes single-stranded DNA with a 3'-end [37].

24 Importantly, addition of the selective RNA polymerase III inhibitor ML-60218 at a  
25 concentration of 10  $\mu$ M - the highest concentration that still produced acceptable levels of  
26 luciferase readings - did not lead to a de-repression of *Renilla* luciferase (Fig. 3A). This is  
27 consistent with our genome-wide RNAi screen where no RNA polymerase III subunit  
28 scored as a hit [4] and it also confirms the undetectable dilncRNA transcription in our RNA  
29 pol-III NET-seq libraries.

30 We had previously determined that the damage-induced siRNA response starts in close  
31 proximity to the break and extends all the way until the transcription start site [3, 4, 40].  
32 The corresponding dilncRNA transcripts thus arise over a stretch of more than 1 kb (e.g.  
33 4.5 kb in the case of CG18273, see supplementary Figures in [4]). This would be unusually  
34 long for an RNA polymerase III transcript and random pol-III termination sequences might  
35 occur along the way. Indeed, inspection of the *CG15098* locus revealed a serendipitous  
36 stretch of eight Adenosines in the second intron. For an RNA polymerase acting in  
37 antisense orientation, this corresponds to a T<sub>8</sub>-sequence preceded by a potential secondary  
38 structure element (see Fig. 3B), which should terminate most RNA polymerase III  
39 transcription complexes [47]. However, the siRNA read density we observed was similar  
40 before and after this pol-III termination site (Fig. 3B). We do note that there is a paucity of  
41 siRNA reads in a ~ 20 nt window surrounding the A<sub>8</sub>/T<sub>8</sub> sequence; most likely this is for  
42 technical reasons given the short, homopolymeric sequence stretch (e.g. Illumina-  
43 sequencing or PCR polymerase drop-off).

44 Taken together, we conclude that RNA polymerase II can be recruited to a DNA double-  
45 strand break and that this is fostered by the spliceosome and the action of the MRN  
46 complex. While it is unlikely that RNA polymerase III functionally contributes to

1 dilncRNA transcription in *Drosophila*, our observations cannot exclude that RNA  
2 polymerase III is recruited to sites of DNA damage without subsequently engaging in  
3 processive transcription of the dilncRNA.

4  
5  
6  
7

## 1 Discussion

2  
3 The observation that splicing stimulates the generation of siRNAs at a transcribed DNA  
4 double-strand break prompted the question of the underlying mechanism. For example, the  
5 spliceosome's role could be to serve as a kind of RNA chaperone that fosters the annealing  
6 of sense and antisense transcript, thus promoting the formation of the dsRNA precursor for  
7 siRNAs at intron-containing genes. We now present evidence that the *rate* of antisense  
8 transcription differs between DSB's in intron-containing and intronless genes. The  
9 spliceosome therefore influences – one way or another – the recruitment of an RNA  
10 polymerase to what normally is the non-template strand (Figure 4).

11 Furthermore, we demonstrate that the antisense running polymerase is RNA polymerase II  
12 in *Drosophila*. This has important implications for how the antisense transcript initiates  
13 since it could be the very same polymerase that synthesizes both sense and antisense  
14 transcript. In this most rudimentary form of “recruitment”, stalling of the splicing reaction  
15 could e.g. contribute to post-transcriptional modifications on RNA polymerase II that  
16 promote direct re-initiation upon a run-off at the break – a “U-turn” movement, essentially.  
17 However, it is currently unclear whether a run-off will occur at a DSB *in vivo* or whether  
18 the polymerase stalls when it encounters the break. As long as the transcript is not cleaved  
19 and removed, this creates an R-loop behind the polymerase with concomitant exposure of  
20 the non-template strand. This stretch of single-stranded DNA could serve as a landing site  
21 for another RNA polymerase complex and transcription thus initiates in the antisense  
22 orientation. In this case, the role of the stalled spliceosome could be to prevent transcript  
23 termination and release, thus extending the lifetime of the R-loop that may contribute to  
24 DNA damage signaling. Alternatively or in addition, signaling events that include or  
25 emanate from spliceosome components [48] could foster polymerase recruitment to the  
26 nearby single-stranded DNA.

27 The currently available data cannot distinguish between the U-turn model and more  
28 elaborate forms of recruitment to the exposed non-template strand. Our small RNA  
29 sequencing data provided siRNA reads starting at a distance of only a few nucleotides from  
30 the break. We did not find any reads that connect the sense and antisense strands (data not  
31 shown). Such reads are expected to be rare, difficult to map bioinformatically and our  
32 protocol for generating small RNA sequencing libraries is not tailored for these “connector-  
33 RNAs”. Furthermore, one would estimate that modifications of RNA polymerase II  
34 associated with initiation are most prevalent in the vicinity of the core promoter initiation  
35 site. A “U-turn” move, i.e. re-initiation of the *same* polymerase, might thus be more  
36 efficient at the beginning of a transcription unit. Yet, we found only inefficient siRNA  
37 generation when a DSB was introduced in proximity to the transcription initiation site [4].  
38 Finally, it is not obvious why a U-turn move in the context of an R-loop would need the  
39 support of the MRN-complex to fray the DNA end. Clearly, further mechanistic studies are  
40 needed to determine how bi-directional transcription by RNA polymerase II is orchestrated  
41 and what the fate of the potentially stalled, sense-running RNA polymerase II complex  
42 may be.

43 By now, several publications provide independent evidence of RNA polymerase II as an  
44 enzyme capable of transcribing the dilncRNA. This includes biochemical reconstitutions  
45 [37], *in vitro* analysis with inhibitors [34], ChIP with qPCR [34] and metagene analysis  
46 after ChIP-Seq [36]. A single-molecule study is also suggestive of RNA polymerase II

1 according to the reported speed [11], but the MS2 stem-loop employed as a reporter can in  
2 principle also be transcribed by RNA polymerase III [49]. We now add our direct  
3 observation of polymerase-associated, nascent transcripts only in RNA polymerase II  
4 NET-seq and the lack of effect for the pol-III inhibitor ML-60218 on damage-induced  
5 siRNA accumulation. It cannot be overstated that differences between organisms may  
6 exist: If the primary purpose is to generate a transcript, then the polymerase type could  
7 easily be swapped during the course of evolution. In plants, for example, genetic analysis  
8 has pinpointed a function of the plant-specific RNA polymerase IV in dilncRNA  
9 transcription [14]. While not all of the published experiments can exclude a concomitant  
10 function of more than one RNA polymerase - i.e. RNA polymerase II (or IV in plants) *and*  
11 RNA polymerase III - in dilncRNA generation, the recent description of RNA polymerase  
12 III as the exclusive source of dilncRNA in cultured human cell lines is surprising [38]. The  
13 situation is further complicated by the discovery that repair of transcribed genes by  
14 homologous recombination is fostered upon the establishment of mixed DNA/RNA  
15 displacement loops involving the normal transcript that runs sense towards the break [50].  
16 A parallel comparison of the diverse experimental systems seems necessary to distinguish  
17 between technical and true biological differences; the latter may prove invaluable to further  
18 our understanding of the molecular mechanisms that lead to dilncRNA transcription.  
19 *Drosophila* core promoters show strong inherent directionality and unlike yeast or  
20 vertebrates, flies often do not generate a divergent, unstable transcript in the direction  
21 opposite to the respective gene [44, 51]; nonetheless, sometimes bi-directional regulatory  
22 elements exist [52]. A genome-wide analysis of spontaneous (i.e. without induced DNA  
23 damage) antisense transcription rates is not straightforward, since especially introns often  
24 harbor transcription units that can be in opposite orientation to the host genes. Furthermore,  
25 cryptic transcription may continue far beyond the annotated poly-A site [17], which  
26 complicates the analysis of rare transcriptional events. Nonetheless, our NET-seq data  
27 appears by and large consistent with the notion of unidirectional core promoter activity.  
28 We refrain from drawing any explicit conclusions due to our limited sequencing depth. We  
29 therefore cannot directly determine how far DNA break-induced dilncRNA transcription  
30 extends in *Drosophila*. For human cells, a distance of roughly 2kb was proposed in one  
31 study based on ChIP [35]. The uniform distribution of *Drosophila* damage-induced  
32 siRNAs along the targeted gene (up to ~4.5 kb in the case of CG18273) suggests a high  
33 processivity of transcription up to the transcription start site of the targeted gene [4].  
34 Because only dsRNA is processed into siRNAs, we cannot track the dilncRNA beyond this  
35 point via its small RNA descendants. It is nonetheless tempting to speculate that the same  
36 mechanism that confers uni-directionality to many promoters might also terminate the  
37 dilncRNA transcription in flies; further experiments are needed to test this hypothesis.  
38  
39  
40  
41  
42

# 1 **Materials and Methods**

## 2 3 **NET-Seq procedure**

### 4 5 *Cell culture*

6 *Drosophila* S2-cells with stable expression of cas9 protein (clone 5-3) were cultured and  
7 transfected as previously described [53]. We further modified this cell line by introducing  
8 a twin V5-tag at the C-terminus of the largest subunit of RNA polymerase II (PolR2A,  
9 CG1554) and III (PolR3A, CG17209), followed by clonal selection as described [54]. For  
10 the NET-seq experiments, we transfected a 30 ml culture of cells expressing tagged RNA  
11 polymerase with guideRNA vectors targeting *CG15098* or *tctp*. The sgRNA expression  
12 cassettes were first generated by PCR, then blunt-end cloned into pJet1.2 to yield pRB59  
13 (*CG15098*) and pRB60 (*tctp*). The target sites were 5'- TCCAGTG TAGCTTCCCGTT-3'  
14 for *CG15098* and 5'- ATATCTAATTTCTTTTAC-3' for *tctp* as described [4].  
15

### 16 *Cell lysis*

17 48 or 36 hours after transfection, the cells were harvested (density 4-5 x 10<sup>6</sup> cells/ml),  
18 resuspended in 500 µl of lysis buffer (10 mM HEPES/KOH PH7.5, 1.5 mM MgCl<sub>2</sub>, 1 mM  
19 DTT, 10 mM EDTA, 10% glycerol and 1% Tergitol-type NP40 (Sigma NP40S)  
20 supplemented with proteinase inhibitors (Roche complete without EDTA)) and incubated  
21 for 10 minutes on ice. Then nuclei were pelleted by centrifugation at 5000xg for 5 minutes  
22 and the supernatant (mostly cytosol) was discarded. The pellet was resuspended in lysis  
23 buffer without EDTA but containing 1 M urea, incubated for 5 minutes on ice and again  
24 pelleted at 5000xg for 5 minutes. The urea washing step was carried out twice in total, then  
25 the nuclei were resuspended in 110 µl of lysis buffer without EDTA and without urea. To  
26 digest the chromatin, 250 U of benzonase (Merck Millipore E1014, 90% purity grade) were  
27 added and the resuspended nuclei were incubated at 37°C for 3 minutes in a heating block.  
28 The digestion was stopped by adding EDTA and NaCl to a concentration of 10 mM and  
29 500 mM, respectively. The insoluble fraction was pelleted by centrifugation at 16000xg  
30 for 5 minutes and the supernatant was used as input material for the immunoprecipitation.  
31

### 32 *Immunoprecipitation*

33 20 µl of magnetic beads (Dynabeads protein G, Invitrogen 10004D) were washed 3 times  
34 with 200 µl of IP buffer (25 mM HEPES/KOH pH 7.5, 150 mM NaCl, 12.5 mM MgCl<sub>2</sub>,  
35 1 mM DTT, 1% Tergitol-Type NP40, 0.1% Empigen (Sigma 30326) supplemented with  
36 Roche complete proteinase inhibitors without EDTA), then 1 µl of V5 antibody was  
37 coupled by rotation at 4 °C over night. On the following day, the beads were washed 3x  
38 with 300 µl of IP buffer, then the input material was added and incubated with agitation  
39 for 60 minutes at 4°C. After separation of the unbound supernatant, the beads were washed  
40 5x with 200 µl of IP-buffer. The immunopurified RNA polymerase complexes were the  
41 digested with proteinase K to liberate the associated nucleic acids and RNA was prepared  
42 by TRIZOL extraction and precipitation.  
43

### 44 *Library generation and data analysis*

45 RNA fragments with a size of 20-28 nt were PAGE-purified to select for the fragments that  
46 were protected from benzonase digestion by the polymerase. Since benzonase products

1 harbor 5'-phosphorylated ends, the RNA fragments were processed for library generation  
2 as described [55] without further treatment. The libraries were sequenced in-house on an  
3 Illumina HiSeq1500 instrument and the reads were processed with custom PERL and  
4 BASH scripts for mapping with Bowtie [56] to the indicated references. During mapping,  
5 no mismatches were tolerated and each hit was reported only once. If multiple, perfectly  
6 matching sequences exist in the reference, the Bowtie algorithm will assign the read  
7 randomly. After mapping, the results were further processed with BEDtools [57] and  
8 custom R!-scripts or the IGV genome browser [58] for data visualization.

9

#### 10 **Luciferase assay**

11 The luciferase assay for the detection of DNA-break induced siRNAs has been previously  
12 described [4]. Briefly, 25 ng of pRB2 (firefly-luciferase, circular), 10 ng of pRB1 (Renilla-  
13 luciferase, circular) and 40 ng of pRB4 (truncated Renilla luciferase, linearized with  
14 EcoRI) were transfected per well of a 96-well plate using Fugene-HD (Promgea). Inhibitors  
15 were added 2 hr prior to transfection in a volume of 1  $\mu$ l DMSO (volume identical for all  
16 compounds and controls). The luciferase assay was performed 96 hrs after transfection  
17 using the Dual-Glo Luciferase assay system (Promega E2920) in a Tecan M-1000 plate  
18 reader. Data analysis was carried out using Microsoft Excel.

19

20

## 1 **Accession numbers**

2

3 The sequencing reads from this study are available at the European Nucleotide Archive  
4 with the accession number PRJEB12939.

5 Custom PERL, BASH and R! scripts have been deposited on Github:

6 [https://github.com/Foerstemann/small\\_RNA\\_seq\\_analysis.git](https://github.com/Foerstemann/small_RNA_seq_analysis.git)

7

8

9

## 10 **Acknowledgements**

11

12 We are grateful for the sequencing support by the laboratory of functional genome  
13 analysis (LaFuGa) at the Gene Center Munich.

14

15

## 16 **Funding**

17

18 This study has been supported by DFG grant FO-360/9-1 to KF.

19

## 1 References

- 2
- 3 1. van Rij, R.P., M.C. Saleh, B. Berry, C. Foo, A. Houk, C. Antoniewski, et al., *The*
- 4 *RNA silencing endonuclease Argonaute 2 mediates specific antiviral immunity in*
- 5 *Drosophila melanogaster*. *Genes & development*, 2006. 20(21): p. 2985-95.
- 6 2. Wood, J.G., B.C. Jones, N. Jiang, C. Chang, S. Hosier, P. Wickremesinghe, et al.,
- 7 *Chromatin-modifying genetic interventions suppress age-associated transposable*
- 8 *element activation and extend life span in Drosophila*. *Proc Natl Acad Sci U S A*,
- 9 2016. 113(40): p. 11277-11282.
- 10 3. Michalik, K.M., R. Bottcher, and K. Forstemann, *A small RNA response at DNA*
- 11 *ends in Drosophila*. *Nucleic acids research*, 2012. 40(19): p. 9596-603.
- 12 4. Merk, K., M. Breinig, R. Bottcher, S. Krebs, H. Blum, M. Boutros, et al., *Splicing*
- 13 *stimulates siRNA formation at Drosophila DNA double-strand breaks*. *PLoS*
- 14 *Genet*, 2017. 13(6): p. e1006861.
- 15 5. Dumesic, P.A., P. Natarajan, C. Chen, I.A. Drinnenberg, B.J. Schiller, J.
- 16 Thompson, et al., *Stalled spliceosomes are a signal for RNAi-mediated genome*
- 17 *defense*. *Cell*, 2013. 152(5): p. 957-68.
- 18 6. Schmidts, I., R. Bottcher, M. Mirkovic-Hosle, and K. Forstemann, *Homology*
- 19 *directed repair is unaffected by the absence of siRNAs in Drosophila*
- 20 *melanogaster*. *Nucleic acids research*, 2016. 44(17): p. 8261-71.
- 21 7. Ciccia, A. and S.J. Elledge, *The DNA damage response: making it safe to play*
- 22 *with knives*. *Mol Cell*, 2010. 40(2): p. 179-204.
- 23 8. Caron, P., J. van der Linden, and H. van Attikum, *Bon voyage: A transcriptional*
- 24 *journey around DNA breaks*. *DNA Repair (Amst)*, 2019. 82: p. 102686.
- 25 9. Ohle, C., R. Tesorero, G. Schermann, N. Dobrev, I. Sinning, and T. Fischer,
- 26 *Transient RNA-DNA Hybrids Are Required for Efficient Double-Strand Break*
- 27 *Repair*. *Cell*, 2016. 167(4): p. 1001-1013 e7.
- 28 10. Iannelli, F., A. Galbiati, I. Capozzo, Q. Nguyen, B. Magnuson, F. Michelini, et
- 29 al., *A damaged genome's transcriptional landscape through multilayered*
- 30 *expression profiling around in situ-mapped DNA double-strand breaks*. *Nat*
- 31 *Commun*, 2017. 8: p. 15656.
- 32 11. Vitor, A.C., S.C. Sridhara, J.C. Sabino, A.I. Afonso, A.R. Grosso, R.M. Martin, et
- 33 al., *Single-molecule imaging of transcription at damaged chromatin*. *Sci Adv*,
- 34 2019. 5(1): p. eaau1249.
- 35 12. Lee, H.-C., S.-S. Chang, S. Choudhary, A.P. Aalto, M. Maiti, D.H. Bamford, et
- 36 al., *qiRNA is a new type of small interfering RNA induced by DNA damage*.
- 37 *Nature*, 2009. 459(7244): p. 274-277.
- 38 13. Francia, S., F. Michelini, A. Saxena, D. Tang, M. de Hoon, V. Anelli, et al., *Site-*
- 39 *specific DICER and DROSHA RNA products control the DNA-damage response*.
- 40 *Nature*, 2012. advance online publication.
- 41 14. Wei, W., Z. Ba, M. Gao, Y. Wu, Y. Ma, S. Amiard, et al., *A Role for Small RNAs*
- 42 *in DNA Double-Strand Break Repair*. *Cell*, 2012. 149(1): p. 101-12.
- 43 15. Preker, P., J. Nielsen, S. Kammler, S. Lykke-Andersen, M.S. Christensen, C.K.
- 44 Mapendano, et al., *RNA exosome depletion reveals transcription upstream of*
- 45 *active human promoters*. *Science*, 2008. 322(5909): p. 1851-4.



- 1 16. Schulz, D., B. Schwalb, A. Kiesel, C. Baejen, P. Torkler, J. Gagneur, et al.,  
2 *Transcriptome surveillance by selective termination of noncoding RNA synthesis.*  
3 *Cell*, 2013. 155(5): p. 1075-87.
- 4 17. Nitschko, V., S. Kunzelmann, T. Frohlich, G.J. Arnold, and K. Forstemann,  
5 *Trafficking of siRNA precursors by the dsRBD protein Blanks in Drosophila.*  
6 *Nucleic Acids Res*, 2020.
- 7 18. Brown, T., F.S. Howe, S.C. Murray, M. Wouters, P. Lorenz, E. Seward, et al.,  
8 *Antisense transcription-dependent chromatin signature modulates sense*  
9 *transcript dynamics.* *Mol Syst Biol*, 2018. 14(2): p. e8007.
- 10 19. Cramer, P., *Organization and regulation of gene transcription.* *Nature*, 2019.  
11 573(7772): p. 45-54.
- 12 20. Hangauer, M.J., I.W. Vaughn, and M.T. McManus, *Pervasive transcription of the*  
13 *human genome produces thousands of previously unidentified long intergenic*  
14 *noncoding RNAs.* *PLoS Genet*, 2013. 9(6): p. e1003569.
- 15 21. Berretta, J. and A. Morillon, *Pervasive transcription constitutes a new level of*  
16 *eukaryotic genome regulation.* *EMBO Rep*, 2009. 10(9): p. 973-82.
- 17 22. Herr, A.J., M.B. Jensen, T. Dalmay, and D.C. Baulcombe, *RNA polymerase IV*  
18 *directs silencing of endogenous DNA.* *Science*, 2005. 308(5718): p. 118-20.
- 19 23. Wierzbicki, A.T., J.R. Haag, and C.S. Pikaard, *Noncoding transcription by RNA*  
20 *polymerase Pol IVb/Pol V mediates transcriptional silencing of overlapping and*  
21 *adjacent genes.* *Cell*, 2008. 135(4): p. 635-48.
- 22 24. Pontier, D., G. Yahubyan, D. Vega, A. Bulski, J. Saez-Vasquez, M.A. Hakimi, et  
23 al., *Reinforcement of silencing at transposons and highly repeated sequences*  
24 *requires the concerted action of two distinct RNA polymerases IV in Arabidopsis.*  
25 *Genes Dev*, 2005. 19(17): p. 2030-40.
- 26 25. Tsuzuki, M., S. Sethuraman, A.N. Coke, M.H. Rothi, A.P. Boyle, and A.T.  
27 Wierzbicki, *Broad noncoding transcription suggests genome surveillance by RNA*  
28 *polymerase V.* *Proc Natl Acad Sci U S A*, 2020. 117(48): p. 30799-30804.
- 29 26. Scheer, U. and K.M. Rose, *Localization of RNA polymerase I in interphase cells*  
30 *and mitotic chromosomes by light and electron microscopic*  
31 *immunocytochemistry.* *Proc Natl Acad Sci U S A*, 1984. 81(5): p. 1431-5.
- 32 27. Ablasser, A., F. Bauernfeind, G. Hartmann, E. Latz, K.A. Fitzgerald, and V.  
33 Hornung, *RIG-I-dependent sensing of poly(dA:dT) through the induction of an*  
34 *RNA polymerase III-transcribed RNA intermediate.* *Nat Immunol*, 2009. 10(10):  
35 p. 1065-72.
- 36 28. Chiu, Y.H., J.B. Macmillan, and Z.J. Chen, *RNA polymerase III detects cytosolic*  
37 *DNA and induces type I interferons through the RIG-I pathway.* *Cell*, 2009.  
38 138(3): p. 576-91.
- 39 29. Ogunjimi, B., S.Y. Zhang, K.B. Sorensen, K.A. Skipper, M. Carter-Timofte, G.  
40 Kerner, et al., *Inborn errors in RNA polymerase III underlie severe varicella*  
41 *zoster virus infections.* *J Clin Invest*, 2017. 127(9): p. 3543-3556.
- 42 30. Yu, H.R., H.C. Huang, H.C. Kuo, J.M. Sheen, C.Y. Ou, T.Y. Hsu, et al., *IFN-*  
43 *alpha production by human mononuclear cells infected with varicella-zoster virus*  
44 *through TLR9-dependent and -independent pathways.* *Cell Mol Immunol*, 2011.  
45 8(2): p. 181-8.

- 1 31. Ramanathan, A., M. Weintraub, N. Orlovetskie, R. Serruya, D. Mani, O. Marcu,  
2 et al., *A mutation in POLR3E impairs antiviral immune response and RNA*  
3 *polymerase III*. Proc Natl Acad Sci U S A, 2020. 117(36): p. 22113-22121.
- 4 32. Hornung, V., J. Ellegast, S. Kim, K. Brzozka, A. Jung, H. Kato, et al., *5'*  
5 *Triphosphate RNA is the ligand for RIG-I*. Science, 2006. 314(5801): p. 994-7.
- 6 33. Asif-Laidin, A., C. Conesa, A. Bonnet, C. Grison, I. Adhya, R. Menouni, et al., *A*  
7 *small targeting domain in Ty1 integrase is sufficient to direct retrotransposon*  
8 *integration upstream of tRNA genes*. EMBO J, 2020. 39(17): p. e104337.
- 9 34. Michelini, F., S. Pitchiaya, V. Vitelli, S. Sharma, U. Gioia, F. Pessina, et al.,  
10 *Damage-induced lncRNAs control the DNA damage response through interaction*  
11 *with DDRNAs at individual double-strand breaks*. Nat Cell Biol, 2017. 19(12): p.  
12 1400-1411.
- 13 35. D'Alessandro, G., D.R. Whelan, S.M. Howard, V. Vitelli, X. Renaudin, M.  
14 Adamowicz, et al., *BRCA2 controls DNA:RNA hybrid level at DSBs by mediating*  
15 *RNase H2 recruitment*. Nat Commun, 2018. 9(1): p. 5376.
- 16 36. Burger, K., M. Schlackow, and M. Gullerova, *Tyrosine kinase c-Abl couples RNA*  
17 *polymerase II transcription to DNA double-strand breaks*. Nucleic Acids Res,  
18 2019. 47(7): p. 3467-3484.
- 19 37. Sharma, S., R. Anand, X. Zhang, S. Francia, F. Michelini, A. Galbiati, et al.,  
20 *MRE11-RAD50-NBS1 Complex Is Sufficient to Promote Transcription by RNA*  
21 *Polymerase II at Double-Strand Breaks by Melting DNA Ends*. Cell Rep, 2021.  
22 34(1): p. 108565.
- 23 38. Liu, S., Y. Hua, J. Wang, L. Li, J. Yuan, B. Zhang, et al., *RNA polymerase III is*  
24 *required for the repair of DNA double-strand breaks by homologous*  
25 *recombination*. Cell, 2021. 184(5): p. 1314-1329 e10.
- 26 39. Bonath, F., J. Domingo-Prim, M. Tarbier, M.R. Friedlander, and N. Visa, *Next-*  
27 *generation sequencing reveals two populations of damage-induced small RNAs at*  
28 *endogenous DNA double-strand breaks*. Nucleic Acids Res, 2018. 46(22): p.  
29 11869-11882.
- 30 40. Kunzelmann, S. and K. Forstemann, *Reversible perturbations of gene regulation*  
31 *after genome editing in Drosophila cells*. PLoS One, 2017. 12(6): p. e0180135.
- 32 41. Churchman, L.S. and J.S. Weissman, *Native elongating transcript sequencing*  
33 *(NET-seq)*. Curr Protoc Mol Biol, 2012. Chapter 4: p. Unit 4 14 1-17.
- 34 42. Nojima, T., T. Gomes, A.R.F. Grosso, H. Kimura, M.J. Dye, S. Dhir, et al.,  
35 *Mammalian NET-Seq Reveals Genome-wide Nascent Transcription Coupled to*  
36 *RNA Processing*. Cell, 2015. 161(3): p. 526-540.
- 37 43. Kwak, H., N.J. Fuda, L.J. Core, and J.T. Lis, *Precise maps of RNA polymerase*  
38 *reveal how promoters direct initiation and pausing*. Science, 2013. 339(6122): p.  
39 950-3.
- 40 44. Core, L.J., J.J. Waterfall, D.A. Gilchrist, D.C. Fargo, H. Kwak, K. Adelman, et  
41 al., *Defining the status of RNA polymerase at promoters*. Cell Rep, 2012. 2(4): p.  
42 1025-35.
- 43 45. Boija, A., D.B. Mahat, A. Zare, P.H. Holmqvist, P. Philip, D.J. Meyers, et al.,  
44 *CBP Regulates Recruitment and Release of Promoter-Proximal RNA Polymerase*  
45 *II*. Mol Cell, 2017. 68(3): p. 491-503 e5.

- 1 46. Shibata, A., D. Moiani, A.S. Arvai, J. Perry, S.M. Harding, M.M. Genois, et al.,  
2 *DNA double-strand break repair pathway choice is directed by distinct MRE11*  
3 *nuclease activities*. Mol Cell, 2014. 53(1): p. 7-18.
- 4 47. Nielsen, S., Y. Yuzenkova, and N. Zenkin, *Mechanism of eukaryotic RNA*  
5 *polymerase III transcription termination*. Science, 2013. 340(6140): p. 1577-80.
- 6 48. Tresini, M., D.O. Warmerdam, P. Kolovos, L. Snijder, M.G. Vrouwe, J.A.  
7 Demmers, et al., *The core spliceosome as target and effector of non-canonical*  
8 *ATM signalling*. Nature, 2015. 523(7558): p. 53-8.
- 9 49. SenGupta, D.J., B. Zhang, B. Kraemer, P. Pochart, S. Fields, and M. Wickens, A  
10 *three-hybrid system to detect RNA-protein interactions in vivo*. Proc Natl Acad  
11 Sci U S A, 1996. 93(16): p. 8496-501.
- 12 50. Ouyang, J., T. Yadav, J.M. Zhang, H. Yang, E. Rheinbay, H. Guo, et al., *RNA*  
13 *transcripts stimulate homologous recombination by forming DR-loops*. Nature,  
14 2021.
- 15 51. Ibrahim, M.M., A. Karabacak, A. GlaHS, E. Kolundzic, A. Hirsekorn, A. Carda, et  
16 al., *Determinants of promoter and enhancer transcription directionality in*  
17 *metazoans*. Nat Commun, 2018. 9(1): p. 4472.
- 18 52. Rennie, S., M. Dalby, M. Lloret-Llinares, S. Bakoulis, C. Dalager Vaagenso, T.  
19 Heick Jensen, et al., *Transcription start site analysis reveals widespread*  
20 *divergent transcription in D. melanogaster and core promoter-encoded enhancer*  
21 *activities*. Nucleic Acids Res, 2018. 46(11): p. 5455-5469.
- 22 53. Bottcher, R., M. Hollmann, K. Merk, V. Nitschko, C. Obermaier, J. Philippou-  
23 Massier, et al., *Efficient chromosomal gene modification with CRISPR/cas9 and*  
24 *PCR-based homologous recombination donors in cultured Drosophila cells*.  
25 Nucleic acids research, 2014.
- 26 54. Kunzelmann, S., R. Bottcher, I. Schmidts, and K. Forstemann, *A Comprehensive*  
27 *Toolbox for Genome Editing in Cultured Drosophila melanogaster Cells*. G3  
28 (Bethesda, Md ), 2016. 6(6): p. 1777-85.
- 29 55. Elmer, K., S. Helfer, M. Mirkovic-Hosle, and K. Forstemann, *Analysis of endo-*  
30 *siRNAs in Drosophila*. Methods in molecular biology, 2014. 1173: p. 33-49.
- 31 56. Langmead, B., C. Trapnell, M. Pop, and S.L. Salzberg, *Ultrafast and memory-*  
32 *efficient alignment of short DNA sequences to the human genome*. Genome Biol,  
33 2009. 10(3): p. R25.
- 34 57. Quinlan, A.R., *BEDTools: The Swiss-Army Tool for Genome Feature Analysis*.  
35 Curr Protoc Bioinformatics, 2014. 47: p. 11 12 1-34.
- 36 58. Robinson, J.T., H. Thorvaldsdottir, W. Winckler, M. Guttman, E.S. Lander, G.  
37 Getz, et al., *Integrative genomics viewer*. Nat Biotechnol, 2011. 29(1): p. 24-6.  
38  
39  
40  
41

## 1 **Figure legends**

### 2 **Figure 1:** Characterization of the NET-Seq approach in *Drosophila* S2-cells

- 3
- 4 a) NET-Seq reads for RNA polymerase II (top) and RNA polymerase III (middle)
- 5 were mapped to the protein-coding gene *actin5C*; “input” refers to a chromatin-
- 6 associated RNA fraction isolated prior to the polymerase-specific
- 7 immunoprecipitation (IP). Reads from a published PRO-Seq experiment are shown
- 8 at the bottom.
- 9 b) NET-Seq reads for RNA polymerase II (top) and RNA polymerase III (middle)
- 10 were mapped to the non-coding 7SK RNA gene, a known RNA polymerase III
- 11 target; reads from a published PRO-Seq experiment are shown at the bottom.
- 12 c) NET-Seq reads for RNA polymerase II (top) and RNA polymerase III (middle)
- 13 were mapped to the *bantam* locus, an RNA polymerase II transcribed non-coding
- 14 RNA; the mature *bantam* miRNA accumulates to high levels in the cytoplasm and
- 15 is also an abundant contamination in our nuclear RNA preparations. Reads from a
- 16 published PRO-Seq experiment are shown at the bottom.
- 17

### 18 **Figure 2:** Net-Seq analysis of dilncRNA transcription

- 19 a) Sample traces for one replicate showing the NET-seq reads of RNA polymerase II
- 20 mapped to *CG15098* (left) and *tctp* (right). In the top row the *CG15098* locus was
- 21 cleaved, while *tctp* was cleaved in the bottom row.
- 22 b) Same as a) but showing the NET-seq reads of RNA polymerase III.
- 23 c) Quantitative analysis of the antisense reads relative to all reads mapped to the
- 24 respective locus revealed a significant increase for *CG15098* in the cleaved state
- 25 (left, t-test unequal variance, n=3). A cartoon shows the genes in the vicinity of
- 26 *CG15098*, the closest neighbor in the same orientation is *CG15099*. Note that this
- 27 gene is convergent with *CG15083* and thus intrinsically has a higher proportion of
- 28 antisense transcripts that map to the overlapping region.
- 29

### 30 **Figure 3:** No evidence for participation of RNA polymerase III in dilncRNA transcription

- 31 a) Luciferase-encoding plasmid based assay for the detection of damage-induced
- 32 siRNAs; a linearized plasmid with a truncated *Renilla* luciferase gene serves as
- 33 donor for dilncRNA transcription, dsRNA formation and processing into siRNAs.
- 34 These in turn repress a co-transfected full-length *Renilla* luciferase vector.
- 35 Inhibition of the MRN-complex with the inhibitor Mirin, but not PFM-01, reduced
- 36 the amount of damage-induced siRNAs. Inhibition of RNA polymerase III with
- 37 ML-60218, however, did not lead to any change of siRNA yield compared with the
- 38 solvent control (DMSO). Three biological replicates of the assay were performed.
- 39 b) A stretch of 8 adenosines in the second intron of *CG15098* will lead to a
- 40 corresponding sequence of 8 thymines in the dilncRNA transcript. This is preceded
- 41 by a potential secondary structure element (shown on the right in 5’->3’
- 42 direction of an antisense transcript) and should lead to termination of RNA polymerase III
- 43 transcription. Hence, a lower density of damage-induced siRNAs should be
- 44 observed beyond this point if RNA polymerase III transcribes the dilncRNA. This
- 45 was, however, not the case. (sequencing data previously published in [4]).
- 46

1

2 **Figure 4:** Model for the recruitment of RNA polymerase II to a DNA double-strand break  
3 in *Drosophila*

4 We had demonstrated that stalled spliceosomes stimulate the generation of damage-  
5 induced siRNAs. Our new results demonstrate that the role of the spliceosome is to recruit  
6 the RNA polymerase for antisense transcription, rather than promote the annealing of the  
7 sense and antisense RNAs. As previously described by others for mammalian cells,  
8 transcript initiation at the break is aided by the Mre11-Rad50-Nbs1 complex in *Drosophila*  
9 as well. It is still unclear whether the spliceosome-mediated recruitment requires MRN, or  
10 whether they are independent possibilities for recruiting RNA polymerase to the DNA  
11 break.

12 Our NET-seq approach, inhibitor treatments and sequence analysis of the *CG15098* model  
13 locus do not provide any evidence for the participation of RNA polymerase III in damage-  
14 induced antisense transcription. However, we cannot rule out the possibility that RNA  
15 polymerase III is recruited to the break and stimulates repair without engaging in  
16 processive transcription.

17

18

## 1 **Supplementary Figure legends**

2  
3 **Supplementary Figure 1:** Outline of the NET-seq procedure and sample gel of quality  
4 control for cleavage efficiency

5  
6 **Supplementary Figure 2:** Genome-wide enrichment analysis for RNA polymerase II and  
7 III

- 8 a) Mapping all reads to the precompiled protein-coding sequences (= ATG-to-stop)  
9 reveals selective enrichment upon IP of RNA polymerase II
- 10 b) Mapping all reads to the precompiled intron sequences reveals enrichment upon IP  
11 of RNA polymerase II in many cases, but a number of introns appear to be at least  
12 in part transcribed by RNA polymerase III. Manual inspection of a subset indicates  
13 that these often harbor highly abundant non-coding RNA genes (snRNAs,  
14 snoRNAs etc.); it is unclear whether this shows *bona fide* pol III transcription or  
15 contamination by abundant RNA species.
- 16 c) At least a subset of tRNA genes is clearly enriched upon IP of RNA polymerase  
17 III.
- 18 d) Mapping all reads to the precompiled “all transcripts” collection (= protein-coding  
19 and non-coding RNA polymerase II transcripts) reveals selective enrichment upon  
20 IP of RNA polymerase II with the notable exception of the *Ntl* locus.
- 21 e) The *Ntl* locus harbors a Tyr-GTA tRNA gene in the first intron, the mapping traces  
22 demonstrate that the assigned reads only come from the tRNA gene and that they  
23 are clearly enriched in RNA polymerase III NET-seq libraries (tracks scaled  
24 according to total genome matching reads in each library). Please note that there are  
25 6 Tyr-GTA tRNA genes in the fly genome with identical mature sequence and only  
26 the gene within the *Ntl* locus contains an intron. Because of the identical sequence,  
27 transcripts arising from any of the 6 tRNA loci will be mapped to each of the 6  
28 genes. We thus cannot conclude that the *Ntl* locus, which fortuitously harbors a  
29 tRNA gene, is pol-III transcribed, but only that at least one of the Tyr-GTA tRNA  
30 loci is pol-III transcribed.

31  
32 **Supplementary Figure 3:** Quantification of NET-seq and input material for a set of genes  
33 (*CG15098*, TCTP, *CG15099* and Act5C)

34  
35  
36  
37  
38

# 1 Figure 1

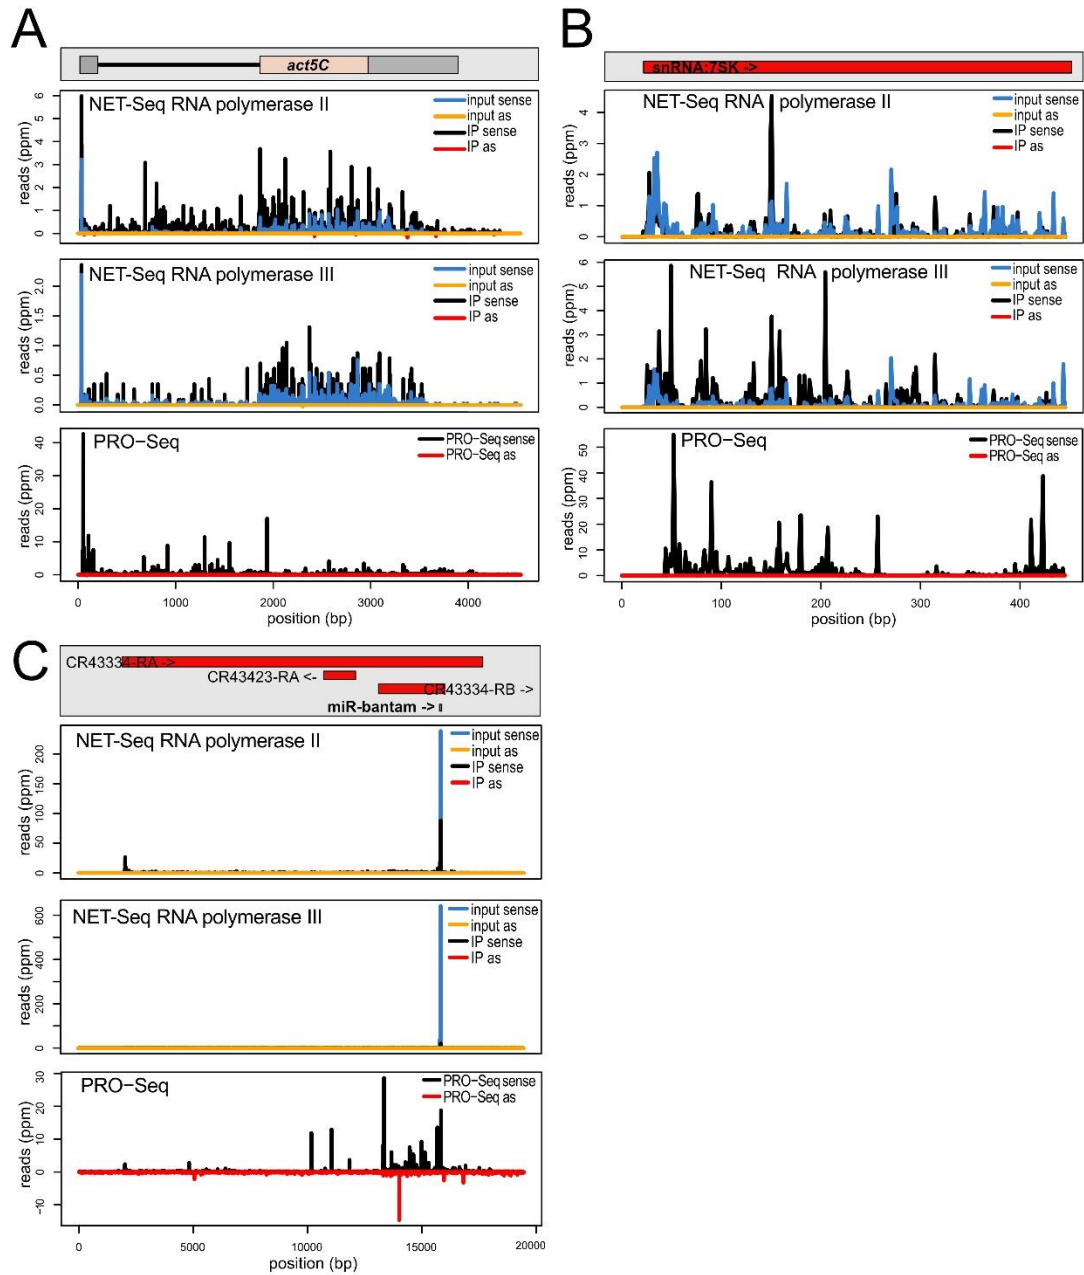

1  
2 **Figure 2:**

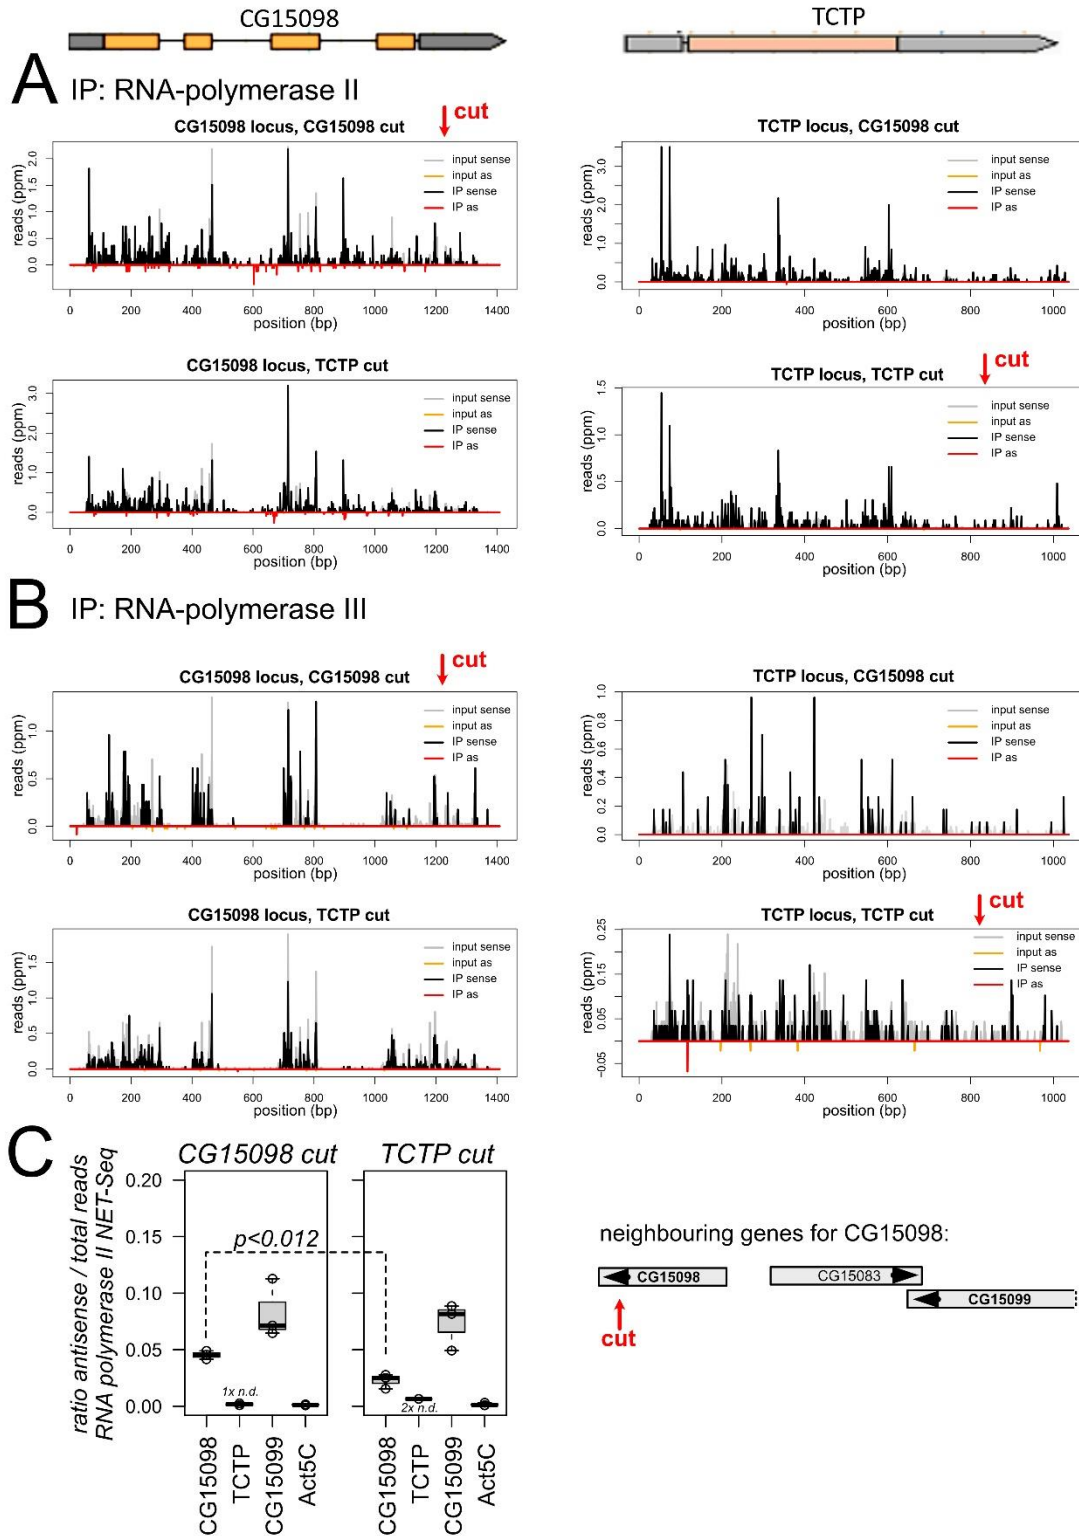



1

2 **Figure 3:**

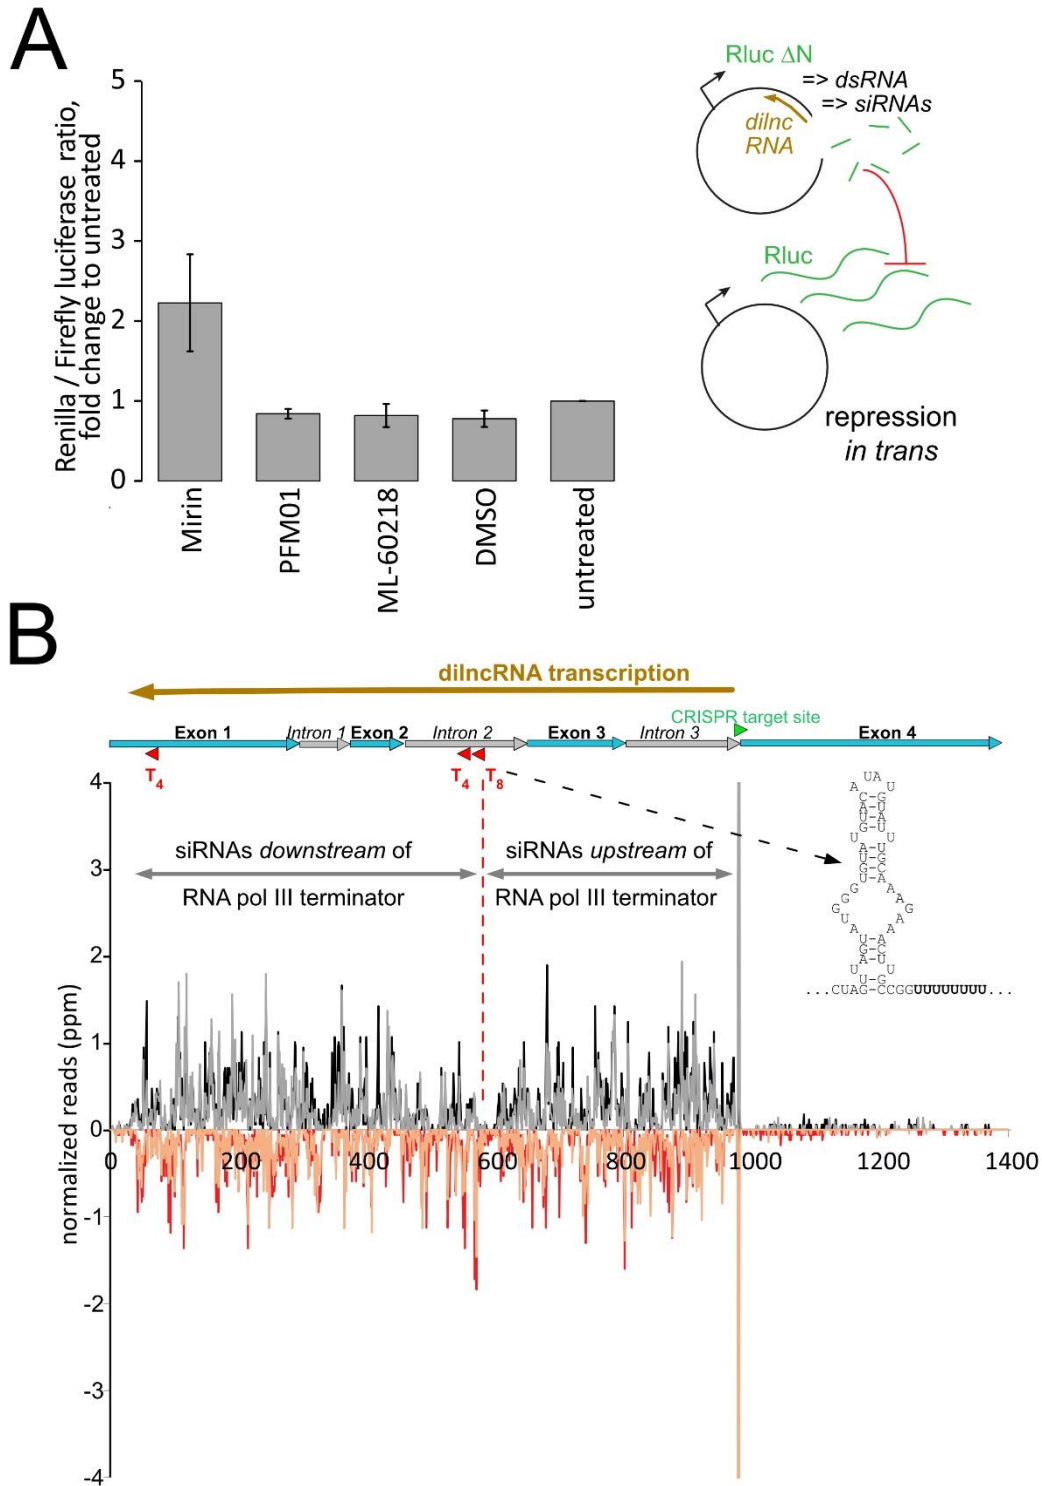

1 **Figure 4:**

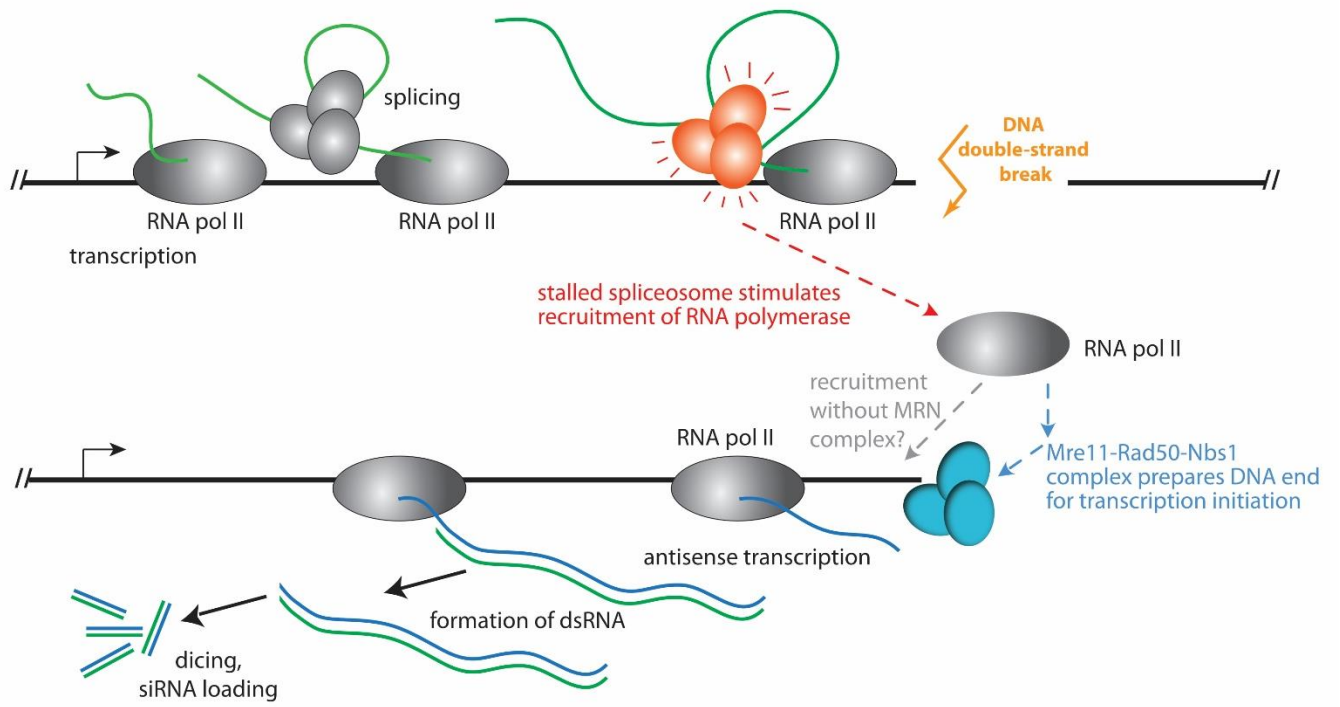

2  
3  
4  
5  
6  
7  
8  
9  
10  
11

## 1 Supplementary Figure 1:

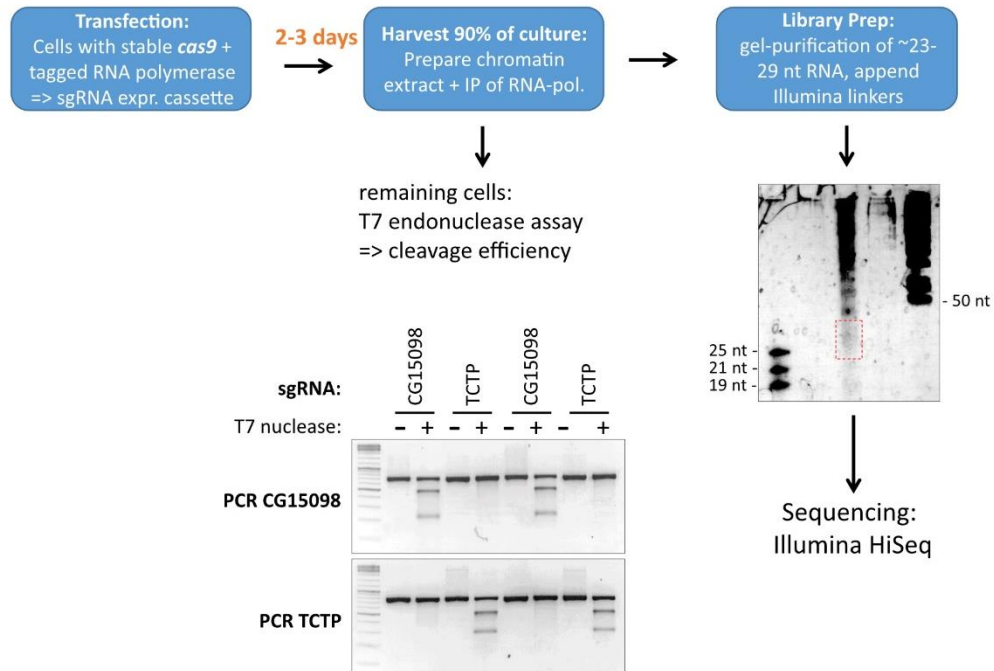

## 2 Supplementary Figure 2:

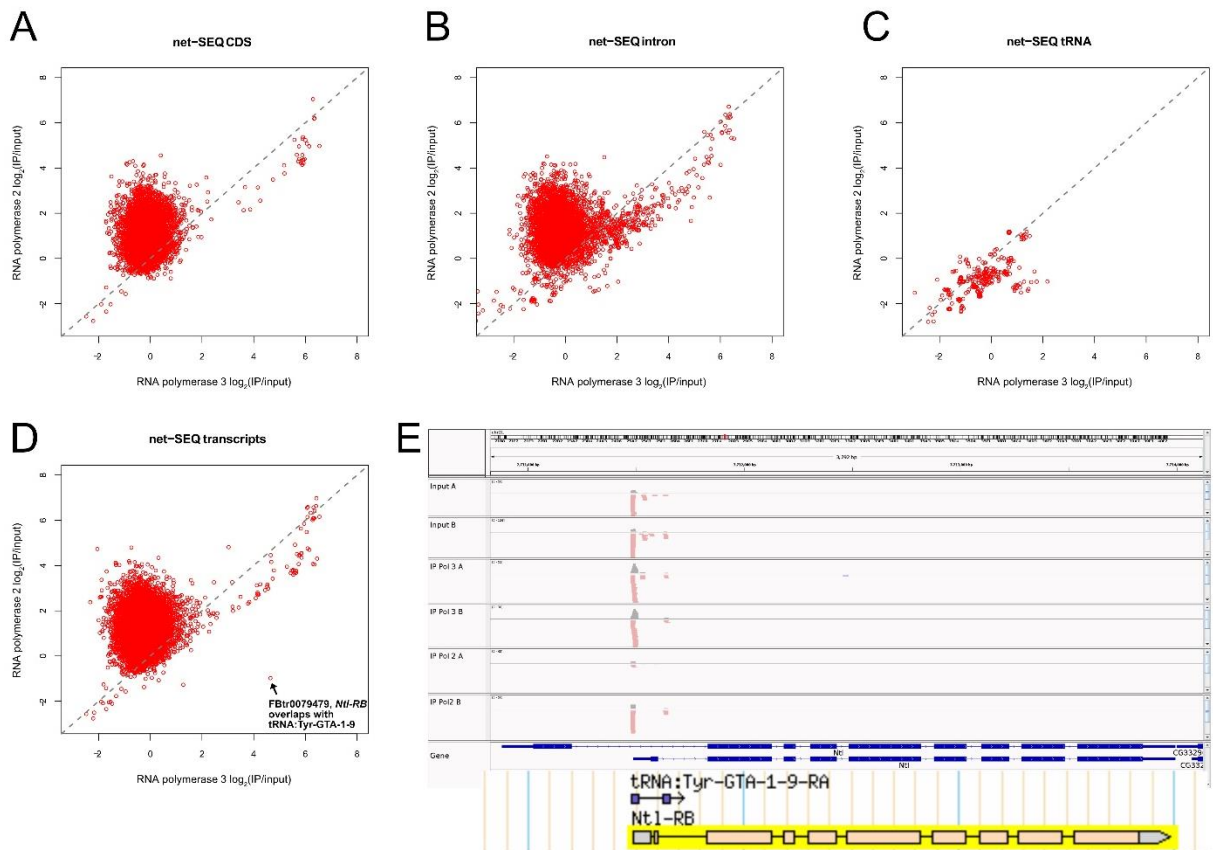

## 1 Supplementary Figure 3:

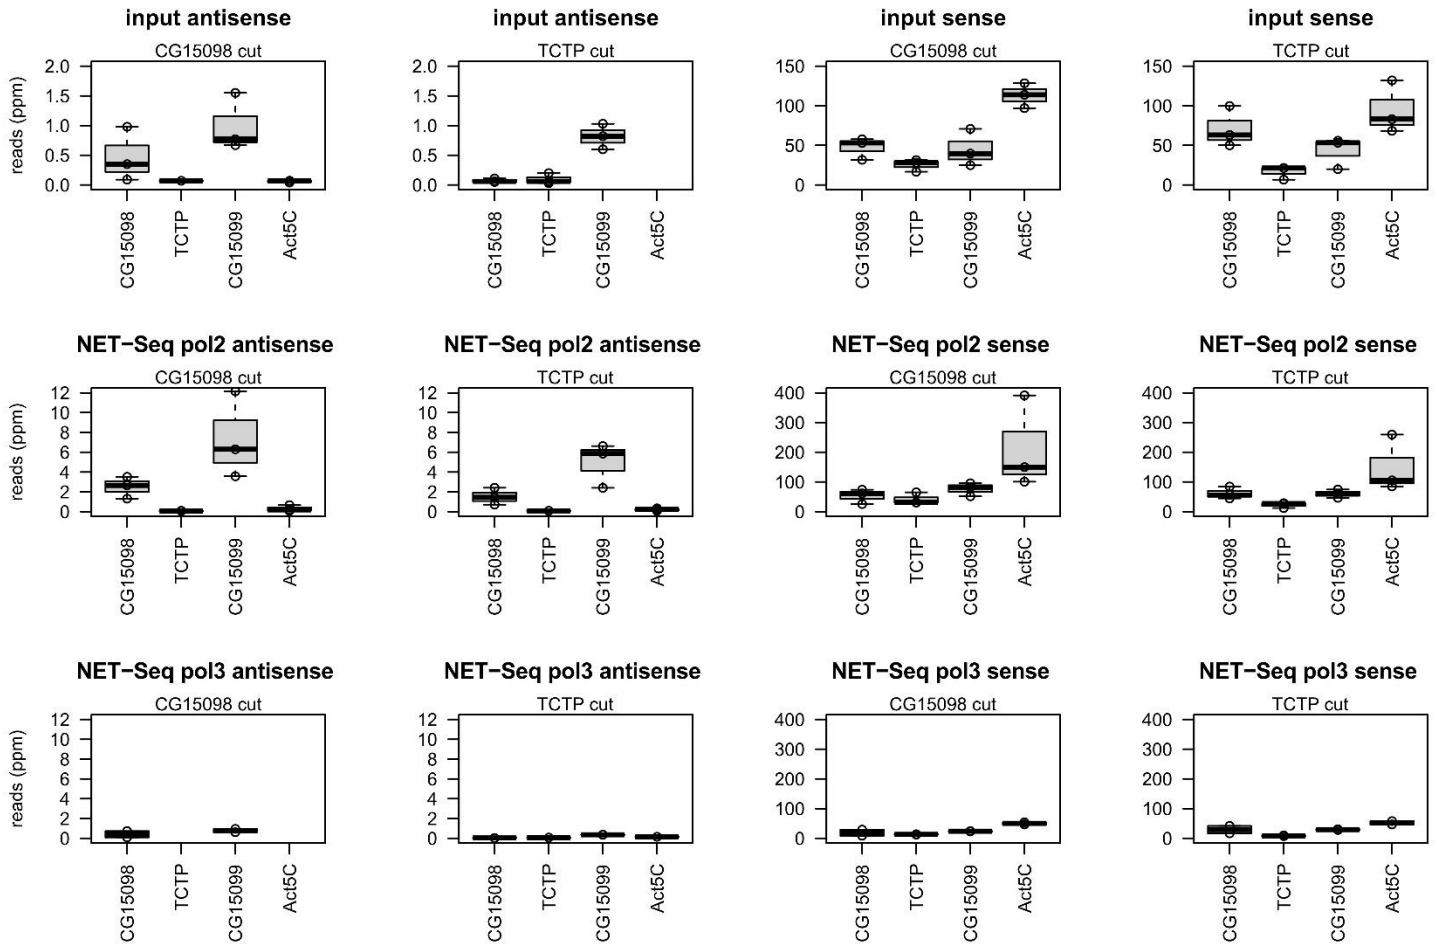

Source: https://www.biorxiv.org/content/10.1101/2021.06.10.447683v1.full.pdf
